# Supplementary material for: Early Corticosteroid Therapy May Increase Ventilator-Associated Lower Respiratory Tract Infection in Critically Ill Patients with COVID-19: A Multicenter Retrospective Cohort Study
Source: MDPI journal article supplement (doi:10.3390/microorganisms10050984), 2022-05-08
Supplement: s1 [file s1]

## Supplementary Materials

**Figure S1:** Study cohort flow chart.

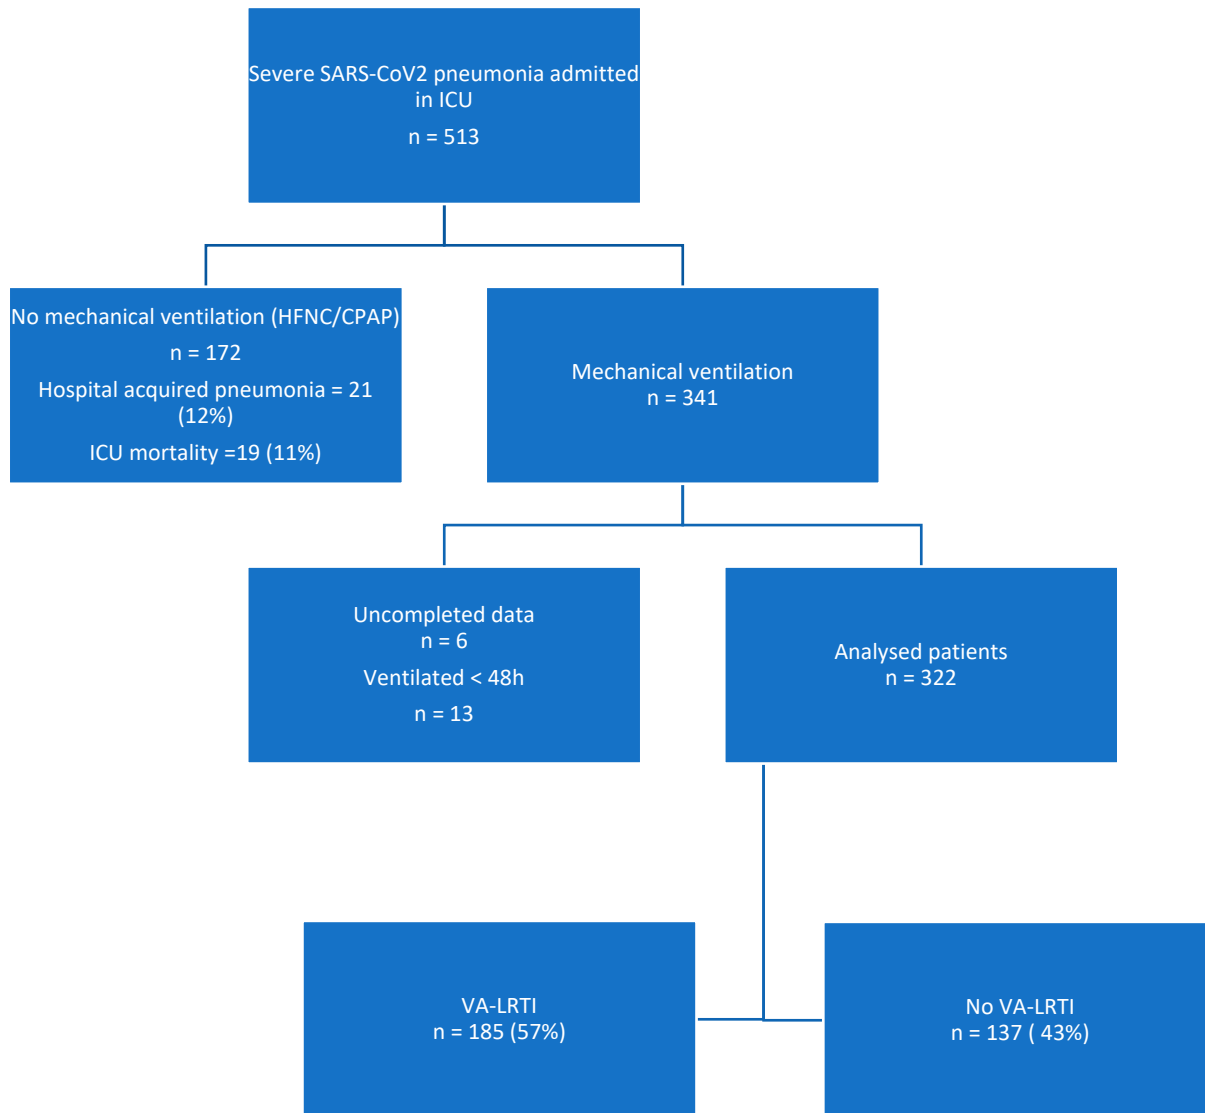

ICU: intensive care unit; HFNC: high-flow nasal cannula; VA-LRTI: ventilator-associated lower respiratory tract infection.

**Figure S2:** Cumulative incidence of ventilatory-associated lower respiratory tract infection within 30 days of mechanical ventilation (black), using a Fine and Gray model, considering extubation (green) or death (red) within 30 days as competing events.

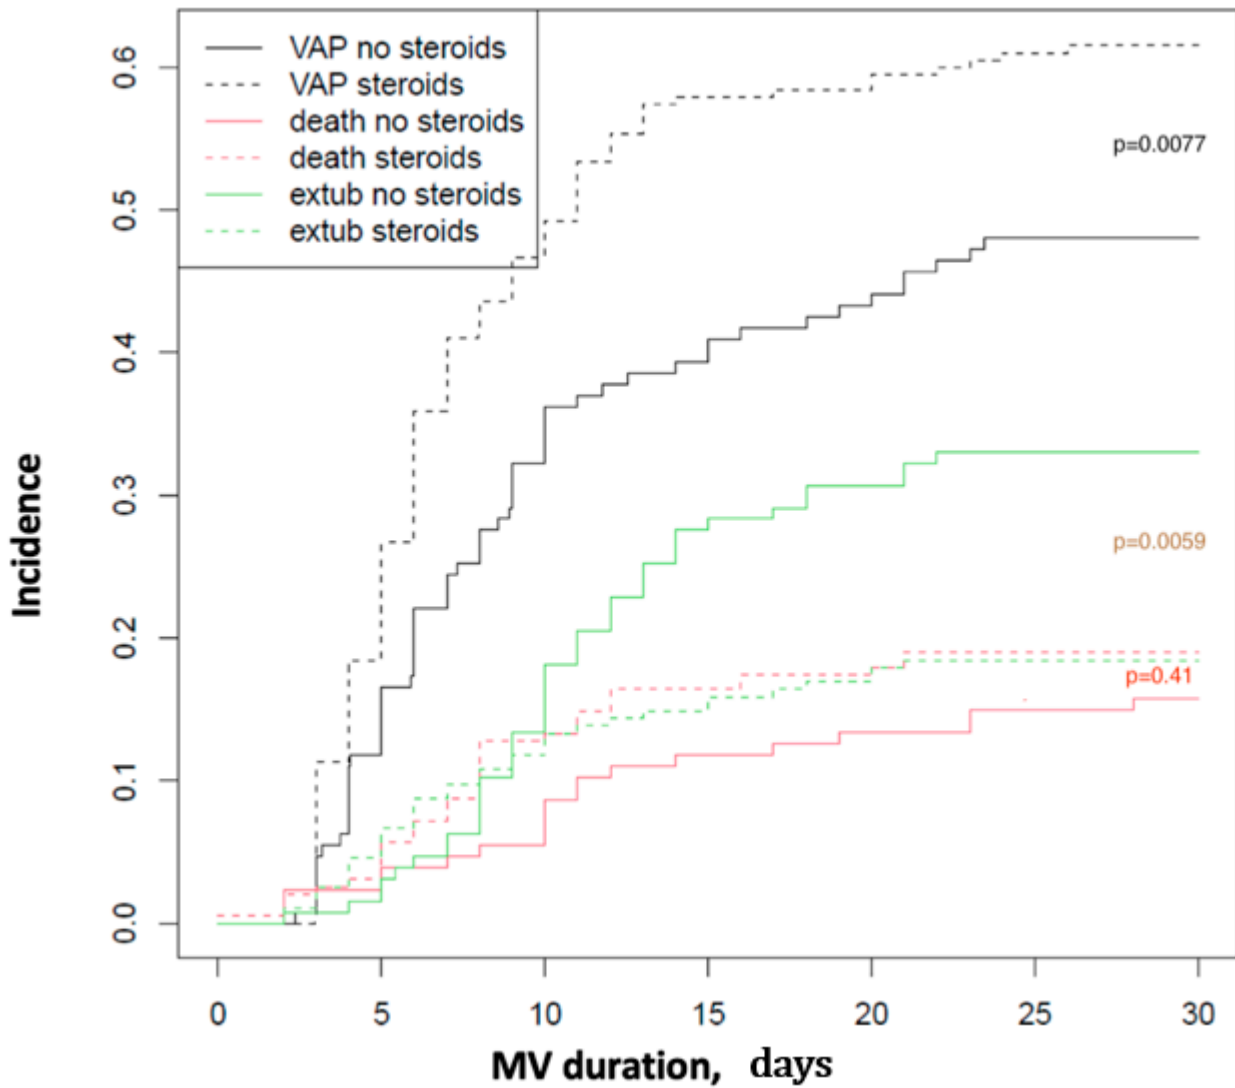

VA-LRTI: ventilator-associated respiratory tract infection; MV: mechanical ventilation.

**Table S1:** Variables associated with successful extubation in 322 patients with severe COVID-19, using a cause-specific hazard model, with mortality considered as a competing event.

| Multivariate           |                       |           |               |
|------------------------|-----------------------|-----------|---------------|
| Variables              | Adjusted Hazard Ratio | IC 95     | p             |
| <b>Corticosteroids</b> | 0.72                  | 0.53–0.98 | <b>0.038</b>  |
| <b>Male Sex</b>        | 0.75                  | 0.53–1.04 | <b>0.09</b>   |
| <b>Age</b>             | 0.97                  | 0.95–0.99 | <b>0.0004</b> |
| Chronic Kidney Disease | 1.51                  | 0.83–2.75 | 0.17          |
| Hypertension           | 1.49                  | 1.04–2.12 | <b>0.02</b>   |
| Diabetes               | 0.93                  | 0.67–1.28 | 0.64          |
| Immunosuppression      | 0.65                  | 0.36–1.17 | 0.15          |

**Table S2:** Variables associated with discharge alive from the ICU in 322 patients with severe COVID-19, using a cause-specific hazard model, with mortality considered as a competing event.

| <b>Multivariate</b>    |                       |           |               |
|------------------------|-----------------------|-----------|---------------|
| <b>Variables</b>       | Adjusted Hazard Ratio | IC 95     | p             |
| <b>Corticosteroids</b> | 0.73                  | 0.53–0.99 | <b>0.046</b>  |
| <b>Male Sex</b>        | 0.74                  | 0.53–1.04 | <b>0.082</b>  |
| <b>Age</b>             | 0.97                  | 0.95–0.99 | <b>0.0004</b> |
| Chronic Kidney Disease | 1.51                  | 0.83–2.75 | 0.18          |
| <b>Hypertension</b>    | 1.50                  | 1.06–2.15 | <b>0.02</b>   |
| Diabetes               | 0.94                  | 0.67–1.29 | 0.68          |
| Immunosuppression      | 0.65                  | 0.36–1.19 | 0.15          |

**Table S3:** Characteristics (pathology and medication) of the thirty patients considered as immunosuppressed.

| Patient | Underlying pathology                               | Immunosuppressive therapy                    |
|---------|----------------------------------------------------|----------------------------------------------|
| 1       | Lymphoma                                           | methotrexate, rituximab                      |
| 2       | Kidney transplant                                  | corticosteroids, tacrolimus, mycophenolate   |
| 3       | Neutropenia                                        | post chemotherapy                            |
| 4       | Kidney transplant                                  | corticosteroids, tacrolimus, mycophenolate   |
| 5       | Kidney transplant                                  | corticosteroids, tacrolimus, mycophenolate   |
| 6       | Ankylosing spondylitis                             | adalimumab, ledertrexate                     |
| 7       | Lymphoma                                           | rituximab                                    |
| 8       | Chronic lymphocyte leukemia, hypogammaglobulinemia | ibrutinib                                    |
| 9       | Kidney transplant                                  | corticosteroids, tacrolimus, mycophenolate   |
| 10      | Systemic lupus erythematosus                       | corticosteroids, mycophenolate               |
| 11      | Rheumatoid arthritis                               | ledertrexate and medrol                      |
| 12      | Kidney transplant                                  | corticosteroids, tacrolimus, mycophenolate   |
| 13      | Kidney transplant                                  | corticosteroids, tacrolimus, mycophenolate   |
| 14      | Systemic lupus erythematosus                       | corticosteroids, mycophenolate               |
| 15      | Rheumatoid arthritis                               | methotrexate                                 |
| 16      | Lymphoma                                           | post chemotherapy                            |
| 17      | Cardiac transplant                                 | corticosteroids, cyclosporine, mycophenolate |
| 18      | Rheumatoid arthritis                               | etanercept                                   |
| 19      | Kidney transplant                                  | corticosteroids, everolimus, mycophenolate   |
| 20      | Rheumatoid arthritis                               | corticosteroids                              |
| 21      | Lymphoma, chronic lymphopenia                      | rituximab                                    |
| 22      | Rheumatoid arthritis                               | ledertrexate                                 |
| 23      | HIV                                                |                                              |
| 24      | Inflammatory bowel disease                         | vedolizumab                                  |
| 25      | Multiple sclerosis                                 | cladribine                                   |
| 26      | Sarcoidosis                                        | corticosteroids                              |
| 27      | Kidney transplant                                  | tacrolimus                                   |
| 28      | Rheumatoid arthritis                               | corticosteroids                              |
| 29      | Myasthenia                                         | corticosteroids                              |
| 30      | Acute myeloid leukemia                             | corticosteroids, methotrexate                |

**Table S4:** Patients characteristics between those developing VA-LRTI or not.

|                                                               | All population<br>(n = 322) | No VA-LRTI<br>(n = 137) | VA-LRTI<br>(n = 185) | p value |
|---------------------------------------------------------------|-----------------------------|-------------------------|----------------------|---------|
| <b>Baseline characteristics</b>                               |                             |                         |                      |         |
| Age (+/- SD)                                                  | 64,8 (+/- 10,4)             | 64,1 (+/- 10,5)         | 65,2 (+/- 10,3)      | 0.30    |
| Male (%)                                                      | 219/322 (68)                | 81/137 (59,1)           | 138/185 (74,6)       | 0.0033  |
| BMI (+/- SD)                                                  | 29,7 (+/- 6,2)              | 30 (+/- 6,2)            | 29,4 (+/- 6,1)       | 0.33    |
| Hypertension (%)                                              | 204/322 (63,3)              | 92/137 (67,1)           | 112/185 (60,5)       | 0.19    |
| Diabetes mellitus (%)                                         | 132/322 (41)                | 52/137 (38)             | 80/185 (43,2)        | 0.37    |
| Cardiomyopathy (%)                                            | 49/322 (15,2)               | 17/137 (12,4)           | 32/185 (17,3)        | 0.24    |
| Chronic kidney disease (%)                                    | 33/322 (10,2)               | 14/137 (10,2)           | 19/185 (10,3)        | 0.99    |
| Immunosuppression (%)                                         | 30/322 (9,3)                | 14/137 (10,2)           | 16/185 (8,7)         | 0.48    |
| COPD (%)                                                      | 28/322 (8,7)                | 10/137 (7,3)            | 18/185 (9,7)         | 0.46    |
| Neoplasia < 2 years (%)                                       | 21/322 (6,5)                | 6/137 (4,4)             | 15/185 (8,1)         | 0.19    |
| <b>Admission characteristics</b>                              |                             |                         |                      |         |
| SOFA (+/- SD)                                                 | 5,6 (+/- 2,4)               | 5,9 (+/- 2,5)           | 5,4 (+/- 2,4)        | 0.13    |
| APACHE II (+/- SD)                                            | 16 (+/- 5,5)                | 16 (+/- 5,5)            | 16 (+/- 5,5)         | 0.95    |
| PaO <sub>2</sub> /FiO <sub>2</sub> , mmHg (+/- SD)            | 93,7 (+/- 47,8)             | 94,3 (+/- 49,5)         | 93,2 (+/- 46,7)      | 0.85    |
| Mild ARDS (PaO <sub>2</sub> /FiO <sub>2</sub> < 300 mmHg)     | 10/322 (3,1)                | 5/137 (3,6)             | 5/185 (2,7)          | 0.62    |
| Moderate ARDS (PaO <sub>2</sub> /FiO <sub>2</sub> < 200 mmHg) | 89/322 (27,6)               | 33/137 (24)             | 56/185 (30,3)        | 0.22    |
| Severe ARDS (PaO <sub>2</sub> /FiO <sub>2</sub> < 100 mmHg)   | 219/322 (68)                | 96/137 (70,1)           | 123/185 (66,5)       | 0.50    |
| Ferritin, mcg/L (+/- SD), 157 missing values                  | 2041 (+/-1794)              | 2260 (+/- 1885)         | 1922 (+/- 1740)      | 0.25    |
| CRP, mg/L (+/- SD)                                            | 172,9 (+/- 101,5)           | 169,3 (+/- 103,3)       | 175,3 (+/- 100,5)    | 0.61    |
| Lymphocytes, /mcL (+/- SD)                                    | 840 (+/- 996)               | 794 (+/- 496)           | 873 (+/- 1237)       | 0.49    |
| Shock (%)                                                     | 53/322 (16,4)               | 26/137 (19)             | 27/185 (51)          | 0.29    |
| Prior antibiotic treatment (%)                                | 143/322 (44,7)              | 75/137 (55,2)           | 68/185 (36,8)        | 0.0012  |
| <b>Treatment</b>                                              |                             |                         |                      |         |
| Hydroxychloroquine (%)                                        | 64/322 (19,9)               | 31/137 (22,6)           | 33/185 (17,8)        | 0.27    |
| Azythromycin (%)                                              | 19/322 (5,9)                | 9/137 (6,5)             | 10/185 (5,4)         | 0.65    |
| Remdesivir (%)                                                | 13/322 (4)                  | 4/137 (2,9)             | 9/185 (4,9)          | 0.38    |

|                                             |                |               |                 |          |
|---------------------------------------------|----------------|---------------|-----------------|----------|
| Early corticosteroid (%)                    | 195/322 (60,6) | 72/137 (52,6) | 123/185 (66,4)  | 0.011    |
| Immunomodulating therapies, IL6 and IL1     |                |               |                 |          |
| antagonist (%)                              | 12/322 (3,7)   | 5/137 (3,7)   | 7/185 (3,8)     | 0.95     |
| ECMO (%)                                    | 44/322 (13,7)  | 12/137 (8,8)  | 32/185 (17,3)   | 0.027    |
| Prone positioning (%)                       | 271/322 (84,2) | 127/137 (92)  | 144/185 (77,8)  | 0.0040   |
| Sedation, days (+/- SD)                     | 14,4 (+/-13,2) | 8,7 (+/- 7,6) | 18,5 (+/- 14,8) | < 0.0001 |
| Hospital admission to intubation, days (+/- |                |               |                 |          |
| SD)                                         | 4,2 (+/- 5,8)  | 4,2 (+/- 5,2) | 4,2 (+/- 6,3)   | 0.98     |

VA-LRTI: ventilator-associated lower respiratory tract infection; ICU: intensive care unit; BMI: body mass index; COPD: chronic obstructive pulmonary disease; SOFA: sequential organ failure assessment; APACHE II: acute physiology and chronic health evaluation II; ARDS: acute respiratory distress syndrome; ECMO: extra-corporeal membrane oxygenation.

**Table S5:** Patients' outcomes between those developing VA-LRTI or not.

|                                        | All population<br>(n = 322) | No VA-LRTI<br>(n = 137) | VA-LRTI<br>(n = 185) | p value  |
|----------------------------------------|-----------------------------|-------------------------|----------------------|----------|
| ICU Mortality (%)                      | 151/322 (46,9)              | 57/137 (41,6)           | 96/185 (51,9)        | 0.067    |
| ICU Day 28 mortality (%)               | 120/322 (37,3)              | 53/137 (38,7)           | 67/185 (36,2)        | 0.65     |
| ICU length of stay, days (+/- SD)      | 23,1 (+/- 20,9)             | 15,6 (+/- 15,2)         | 28,6 (+/- 22,9)      | < 0.0001 |
| Duration of ventilation, days (+/- SD) | 18,3 (+/- 17)               | 11,4 (+/- 11,6)         | 23,3 (+/-18,5)       | < 0.0001 |
| Ventilatory-free day D28 (+/- SD)      | 6,8 (+/- 8,7)               | 10 (+/- 9,7)            | 4,4 (+/- 7)          | < 0.0001 |
| Bloodstream infection (%)              | 73/322 (22,6)               | 16/137 (11,7)           | 57/185 (30,8)        | < 0.0001 |

VA-LRTI: ventilator-associated lower respiratory tract infection; ICU: intensive care unit.



**Table S6:** Patients characteristics between first vs. second and third waves.

|                                                                  | All population<br>(n = 322) | First wave<br>(n = 91) | Second and third<br>waves (n = 231) | p value |
|------------------------------------------------------------------|-----------------------------|------------------------|-------------------------------------|---------|
| <b>Baseline characteristics</b>                                  |                             |                        |                                     |         |
| Age (+/- SD)                                                     | 64,8 (+/- 10,4)             | 63,3 (+/- 10,4)        | 65,3 (+/- 10,3)                     | 0.11    |
| Male (%)                                                         | 219/322 (68)                | 60/91 (65,9)           | 159/231 (68,8)                      | 0.62    |
| BMI (+/- SD)                                                     | 29,7 (+/- 6,2)              | 29,3 (+/- 4,8)         | 29,9 (+/- 6,6)                      | 0.43    |
| Hypertension (%)                                                 | 204/322 (63,3)              | 92/137 (67,1)          | 145/231 (62,8)                      | 0.64    |
| Diabetes mellitus (%)                                            | 132/322 (41)                | 29/91 (32,1)           | 103/231 (44,6)                      | 0.043   |
| Cardiomyopathy (%)                                               | 49/322 (15,2)               | 9/91 (9,9)             | 40/231 (17,3)                       | 0.10    |
| Chronic kidney disease (%)                                       | 33/322 (10,2)               | 4/91 (4,3)             | 29/231 (12,6)                       | 0.032   |
| Immunosuppression (%)                                            | 30/322 (9,3)                | 6/91 (6,5)             | 25/231 (10,8)                       | 0.25    |
| COPD (%)                                                         | 28/322 (8,7)                | 6/91 (6,5)             | 22/231 (9,5)                        | 0.42    |
| Neoplasia < 2 years (%)                                          | 21/322 (6,5)                | 3/91 (3,2)             | 18/231 (7,8)                        | 0.051   |
| <b>Admission characteristics</b>                                 |                             |                        |                                     |         |
| SOFA (+/- SD)                                                    | 5,6 (+/- 2,4)               | 5,5 (+/- 2,6)          | 5,7 (+/- 2,4)                       | 0.71    |
| APACHE II (+/- SD)                                               | 16 (+/- 5,5)                | 15,9 (+/- 5,4)         | 16 (+/- 5,5)                        | 0.87    |
| PaO <sub>2</sub> /FiO <sub>2</sub> , mmHg (+/- SD)               | 93,7 (+/- 47,8)             | 100 (+/- 51)           | 91 (+/- 46,4)                       | 0.11    |
| Mild ARDS (PaO <sub>2</sub> /FiO <sub>2</sub> < 300<br>mmHg)     | 10/322 (3,1)                | 4/91 (4,4)             | 6/231 (2,6)                         | 0.40    |
| Moderate ARDS (PaO <sub>2</sub> /FiO <sub>2</sub> <<br>200 mmHg) | 89/322 (27,6)               | 31/91 (34)             | 58/231 (25,1)                       | 0.10    |
| Severe ARDS (PaO <sub>2</sub> /FiO <sub>2</sub> < 100<br>mmHg)   | 219/322 (68)                | 55/91 (60,4)           | 164/231 (71)                        | 0.068   |

|                                                        |                   |                    |                 |        |
|--------------------------------------------------------|-------------------|--------------------|-----------------|--------|
| Ferritin, mcg/L (+/- SD), 157<br><i>missing values</i> | 2041 (+/-1794)    | 2239 (+/-<br>2017) | 1997 (+/- 1745) | 0.50   |
| CRP, mg/L (+/- SD)                                     | 172,9 (+/- 101,5) | 190,4 (+/- 100)    | 167 (+/- 102)   | 0.074  |
| Lymphocytes, /mcL (+/- SD)                             | 840 (+/- 996)     | 820 (+/- 450)      | 847 (+/- 1143)  | 0.83   |
| Shock (%)                                              | 53/322 (16,4)     | 16/91 (17,6)       | 37/231 (16)     | 0.73   |
|                                                        |                   |                    |                 | <      |
| Prior antibiotic treatment (%)                         | 143/322 (44,7)    | 62/91 (68,8)       | 81/231 (35,2)   | 0.0001 |
| <b>Treatment</b>                                       |                   |                    |                 |        |
|                                                        |                   |                    |                 | <      |
| Hydroxychloroquine (%)                                 | 64/322 (19,9)     | 61/91 (67,8)       | 3/231 (1,3)     | 0.0001 |
|                                                        |                   |                    |                 | <      |
| Azythromycin (%)                                       | 19/322 (5,9)      | 16/91 (17,7)       | 3/231 (1,3)     | 0.0001 |
| Remdesivir (%)                                         | 13/322 (4)        | 6/91 (6,6)         | 7/231 (3)       | 0.14   |
|                                                        |                   |                    |                 | <      |
| Early corticosteroid (%)                               | 195/322 (60,6)    | 3/91 (3,3)         | 192/231 (83,1)  | 0.0001 |
| Immunomodulating therapies,                            |                   |                    |                 |        |
| IL6 and IL1 antagonist (%)                             | 12/322 (3,7)      | 2/91 (2,2)         | 10/231 (4,3)    | 0.36   |
| ECMO (%)                                               | 44/322 (13,7)     | 14/91 (15,4)       | 30/231 (13)     | 0.57   |
| Hospital admission to                                  |                   |                    |                 |        |
| intubation, days (+/- SD)                              | 4,2 (+/- 5,8)     | 3,7 (+/- 4,3)      | 4,4 (+/- 6,3)   | 0.32   |

VA-LRTI: ventilator-associated lower respiratory tract infection; ICU: intensive care unit; BMI: body mass index; COPD: chronic obstructive pulmonary disease; SOFA: sequential organ failure assessment; APACHE II: acute physiology and chronic health evaluation II; ARDS: acute respiratory distress syndrome; ECMO: extra-corporeal membrane oxygenation.

**Table S7:** Patients' outcomes between first vs. second and third waves.

|                                           | All population<br>(n = 322) | First wave<br>(n = 91) | Second and third<br>waves (n = 231) | p value |
|-------------------------------------------|-----------------------------|------------------------|-------------------------------------|---------|
| ICU Mortality (%)                         | 151/322 (46,9)              | 35/91 (38,5)           | 118/231 (51,1)                      | 0.041   |
| Duration of ventilation, days<br>(+/- SD) | 18,3 (+/- 17)               | 18,3 (+/- 13,5)        | 18,3 (+/-18,2)                      | 0.99    |
| Ventilatory-free day D28 (+/-<br>SD)      | 6,8 (+/- 8,7)               | 7,5 (+/- 8,2)          | 6,5 (+/- 8,9)                       | 0.40    |
| VA-LRTI                                   | 185/322 (57,5)              | 40/91 (44)             | 145/231 (63)                        | 0.0021  |
| Bloodstream infection (%)                 | 73/322 (22,6)               | 16/91 (17,6)           | 57/230 (24,8)                       | 0.17    |

VA-LRTI: ventilator-associated lower respiratory tract infection; ICU: intensive care unit.
